# Supplementary material
Source: HighWire-hosted journal article supplement (https://drc.bmj.com/content/7/1/e000624)
Supplement: inline-supplementary-material-1 [file inline-supplementary-material-1.pdf]

| Questionnaire for the Diabetes campaign                                            |                                                                                |                                                                                |                                            |                                                    |                                         | Date:                              |                                      |
|------------------------------------------------------------------------------------|--------------------------------------------------------------------------------|--------------------------------------------------------------------------------|--------------------------------------------|----------------------------------------------------|-----------------------------------------|------------------------------------|--------------------------------------|
| <input type="checkbox"/> post                                                      | <input type="checkbox"/> Pre                                                   | Code:                                                                          | Patient No. :                              |                                                    |                                         |                                    |                                      |
| Health Center Name :                                                               |                                                                                |                                                                                | Patient Name                               |                                                    |                                         |                                    |                                      |
| Please answer all the following questions by marking (v) in the appropriate places |                                                                                |                                                                                |                                            |                                                    |                                         |                                    |                                      |
| Information about patient                                                          |                                                                                |                                                                                |                                            |                                                    |                                         |                                    |                                      |
|                                                                                    |                                                                                |                                                                                |                                            |                                                    |                                         |                                    |                                      |
| <b>Information about patient</b>                                                   |                                                                                |                                                                                |                                            |                                                    |                                         |                                    |                                      |
| 1                                                                                  | What type of Diabetes you have?                                                | <input type="checkbox"/> Type 1                                                | <input type="checkbox"/> Type II           | <input type="checkbox"/> I don't Know              |                                         |                                    |                                      |
| 2                                                                                  | Are you hypertensive?                                                          | <input type="checkbox"/> Yes                                                   | <input type="checkbox"/> No                | <input type="checkbox"/> I don't know              |                                         |                                    |                                      |
| 3                                                                                  | Do you Smoke?                                                                  | <input type="checkbox"/> Yes                                                   | <input type="checkbox"/> No                |                                                    |                                         |                                    |                                      |
| <b>Drug Use</b>                                                                    |                                                                                |                                                                                |                                            |                                                    |                                         |                                    |                                      |
| 5                                                                                  | Do you think that there is cure for DM?                                        | <input type="checkbox"/> Yes                                                   | <input type="checkbox"/> No                | <input type="checkbox"/> Yes with life style       | <input type="checkbox"/> I Don't know   |                                    |                                      |
| 6                                                                                  | Do you think diabetes can be controlled by medicine only?                      | <input type="checkbox"/> Yes                                                   | <input type="checkbox"/> No.               | <input type="checkbox"/> I don't Know              |                                         |                                    |                                      |
| 7                                                                                  | are committed to your medicine prescription                                    | <input type="checkbox"/> Always                                                | <input type="checkbox"/> Often             | <input type="checkbox"/> Some times                | <input type="checkbox"/> I don't know   |                                    |                                      |
| <b>General Knowledge about Diabetes</b>                                            |                                                                                |                                                                                |                                            |                                                    |                                         |                                    |                                      |
| 8                                                                                  | person is considered diabetic if the blood sugar is (after 8-12 hour fasting): | person is considered diabetic if the blood sugar is (after 8-12 hour fasting): | <input type="checkbox"/> 100-125           | <input type="checkbox"/> 126 and above             | <input type="checkbox"/> I don't know   |                                    |                                      |
| 9                                                                                  | Postprandial-BG consider to be controlled if it's:                             | Postprandial-BG consider to be controlled if it's:                             | <input type="checkbox"/> Less or equal 180 | <input type="checkbox"/> None of the mention       | <input type="checkbox"/> I don't know   |                                    |                                      |
| 10                                                                                 | diabetes Symptoms are:                                                         | diabetes Symptoms are:                                                         | <input type="checkbox"/> feeling thirsty   | <input type="checkbox"/> <b>Frequent urination</b> | <input type="checkbox"/> feeling hunger | <input type="checkbox"/> bleeding  | <input type="checkbox"/> No symptoms |
| 11                                                                                 | Diabetes Complications are?                                                    | Diabetes Complications are?                                                    | <input type="checkbox"/> visually impaired | <input type="checkbox"/> heart attack              | <input type="checkbox"/> arthritis      | <input type="checkbox"/> Strokes   |                                      |
| <b>Physical activity</b>                                                           |                                                                                |                                                                                |                                            |                                                    |                                         |                                    |                                      |
| 12                                                                                 | Do you regularly walk?                                                         | <input type="checkbox"/> Yes                                                   | <input type="checkbox"/> No                | <input type="checkbox"/> sometimes                 |                                         |                                    |                                      |
|                                                                                    | If you exercise, how many times/week you exercise at least 35 minutes?         | <input type="checkbox"/> One                                                   | <input type="checkbox"/> Twice             | Three times                                        | <input type="checkbox"/> Five times     | <input type="checkbox"/> Every day |                                      |

| Life style               |                                                                                        |                                              |                                             |                                           |                                              |                                       |
|--------------------------|----------------------------------------------------------------------------------------|----------------------------------------------|---------------------------------------------|-------------------------------------------|----------------------------------------------|---------------------------------------|
| 13                       | Which of the following are the best cooking practices?                                 | <input type="checkbox"/> Frying              | <input type="checkbox"/> boil               | <input type="checkbox"/> grill            | <input type="checkbox"/> mixed               | <input type="checkbox"/> I don't know |
| 14                       | Which of the following are the best types of oil to use during cooking?                | <input type="checkbox"/> sunflower oil       | <input type="checkbox"/> corn oil           | <input type="checkbox"/> Olive oil        | <input type="checkbox"/> margarine or butter | <input type="checkbox"/> I don't know |
| 15                       | When do you add salt in your plate                                                     | <input type="checkbox"/> Before tasting food | <input type="checkbox"/> After tasting food | <input type="checkbox"/> I don't add salt |                                              |                                       |
| 16                       | What is the best way in adding oil during cooking?                                     | <input type="checkbox"/> Using a spoon       | <input type="checkbox"/> By estimation      | <input type="checkbox"/> I don't know     |                                              |                                       |
| 17                       | How many meals you eat along the day                                                   | <input type="checkbox"/> one                 | <input type="checkbox"/> two                | <input type="checkbox"/> three            | <input type="checkbox"/> four                | <input type="checkbox"/> 5-6          |
| 18                       | If you take more than one meal/day, answer the following                               |                                              |                                             |                                           |                                              |                                       |
| A                        | When do you take the first meal                                                        | <input type="checkbox"/> 6-8 am              | <input type="checkbox"/> 8-10am             | <input type="checkbox"/> 10am             | <input type="checkbox"/> After 12 pm         |                                       |
| B                        | When do you take your last meal                                                        | <input type="checkbox"/> 4-6 afternoon       | <input type="checkbox"/> 6-8 evening        | <input type="checkbox"/> 8-10 evening     | <input type="checkbox"/> After 10 evening    |                                       |
| 19                       | Do you eat any food during watching TV or working on computer, if yes what you eat     |                                              |                                             |                                           |                                              |                                       |
| A                        | <input type="checkbox"/> Yes                                                           | <input type="checkbox"/> vegetable           | <input type="checkbox"/> chips              | <input type="checkbox"/> popcorn          | <input type="checkbox"/> chocolate           | <input type="checkbox"/> Nuts         |
| B                        | <input type="checkbox"/> No                                                            |                                              |                                             |                                           |                                              |                                       |
| Natural Information      |                                                                                        |                                              |                                             |                                           |                                              |                                       |
| 20                       | Which of the following foods items influence your BG in a positive or negatively way : |                                              |                                             |                                           |                                              |                                       |
|                          | <b>Food kind</b>                                                                       | <b>Positively</b>                            | <b>Negatively</b>                           | <b>Don't know</b>                         |                                              |                                       |
|                          | • Vegetable                                                                            |                                              |                                             |                                           |                                              |                                       |
|                          | • whole wheat bread                                                                    |                                              |                                             |                                           |                                              |                                       |
|                          | • one or two pcs of fruits                                                             |                                              |                                             |                                           |                                              |                                       |
|                          | • high quantities of rice,<br>• bread and potato                                       |                                              |                                             |                                           |                                              |                                       |
|                          | • chicken                                                                              |                                              |                                             |                                           |                                              |                                       |
|                          | • high fat meat                                                                        |                                              |                                             |                                           |                                              |                                       |
|                          | • Margarine or butter and oil                                                          |                                              |                                             |                                           |                                              |                                       |
|                          | • high quantity of olive oil                                                           |                                              |                                             |                                           |                                              |                                       |
|                          | • pickles                                                                              |                                              |                                             |                                           |                                              |                                       |
|                          | • sugar added juice                                                                    |                                              |                                             |                                           |                                              |                                       |
|                          | • legumes and beans limited quantities                                                 |                                              |                                             |                                           |                                              |                                       |
|                          | • sweet                                                                                |                                              |                                             |                                           |                                              |                                       |
| <b>End of Questioner</b> |                                                                                        |                                              |                                             |                                           |                                              |                                       |
